# Supplementary material for: Spatial, well-defined metal-corrole-based covalent organic polymers for remarkably enhanced multipurpose electrocatalysis and high-performance zinc–air batteries
Source: Royal Society of Chemistry journal article supplement (doi:10.1039/d3cy00802a), 2023-01-01
Supplement: d3cy00802a1.pdf [file d3cy00802a1.pdf]

## Spatial Well-defined Metal-Corrole-Based Covalent Organic Polymers toward Remarkably Enhanced Multipurpose Electrocatalysis and High-Performance Zinc-Air Batteries

Yan-Fang Yao<sup>a</sup>, Zhen-Yu Huang<sup>a</sup>, Wan-Yue Xie<sup>a</sup>, Si-Jing Huang<sup>b\*</sup>, Zheng-Yan Liu<sup>a</sup>, Gang Yang<sup>a</sup>, Jian-Shan Ye<sup>a</sup>, Hai-Yang Liu<sup>a\*</sup>, and Xin-Yan Xiao<sup>a\*</sup>

<sup>a</sup> School of Chemistry and Chemical Engineering, Guangdong Provincial Key Laboratory of Fuel Cell Technology, South China University of Technology, Guangzhou 510641, China

<sup>b</sup> Analytical and Testing Center, South China University of Technology, Guangzhou 510641, China.

Corresponding authors:

E-mail addresses: czhsj@scut.edu.cn (S.J. Huang); chhyliu@scut.edu.cn (H.Y. Liu); cexyxiao@scut.edu.cn (X.Y. Xiao)

### 1. General Methods and Materials

All reagents were purchased from commercial suppliers and were used directly without further purification unless otherwise stated (pyrrole was freshly distilled before use). All solvents used in these experiments were reagent grades. Carbon black (CB, acetylene, 50% compressed, 99.9+%) was purchased from Alfa.

#### Zn-air battery fabrication

The anode was prepared using a polished Zn foil (0.25 mm). The air electrode was prepared using carbon cloth (CC) coated with Co-COP or Pt/Ir-based material. A hot press method was used to attach the CC (1.5 × 1.5 cm<sup>2</sup>) onto the gas diffusion layer (GDL). for the cathode, a chemical ink was prepared using 2 mg Co-COP and 2 mg carbon black was dissolved in a mixture of 100 μL Nafion in 300 μL isopropanol. The solution was ultrasonicated for 1 h for thorough dispersion and deposited on the gas diffusion layer (GDL) (Toray Carbon 60, Alfa Aesar, 200 μm). Then, the acquired GDL

was dried under the infrared light. 6 M KOH and 0.2 M Zinc acetate were used as an aqueous electrolyte. The GDL geometric diameter was kept at 1 cm. The open circuit potential of Zn-air battery was measured directly when assembled with different catalysts. The performance was studied using galvanostatic charge-discharge and chronopotentiometry. For comparison, GDL was prepared using 2 mg Pt/C and IrO<sub>2</sub> by following a similar procedure as our polymer.

## 2. Synthesis procedures

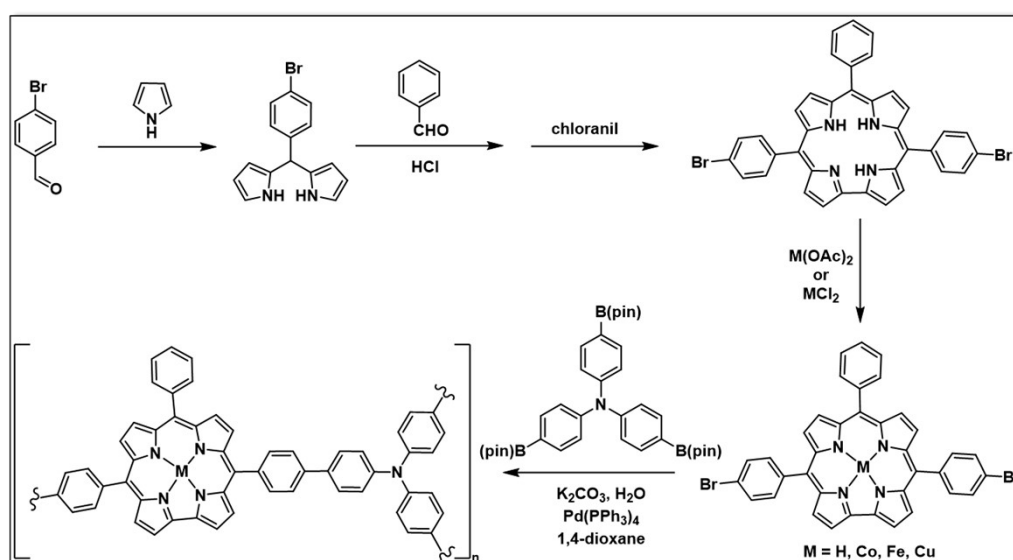

**Scheme S1.** Synthetic route of metal corroles.

### Synthesis of 5-(4-bromophenyl)-dipyrromethane:

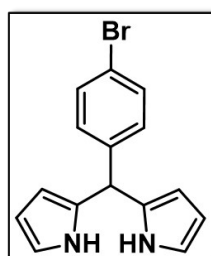

4-bromobenzaldehyde (2 g, 10.80 mmol), and freshly distilled pyrrole (50 ml, 723 mmol) were mixed under inert atmosphere. InCl<sub>3</sub> (0.24 g, 1.08 mmol) was added and the mixture was stirred for 2 h at room temperature. Then, powdered NaOH (0.4 g, 10 mmol) was added and the mixture was stirred for an additional 1 h. After filtration, the filtrate was concentrated under vacuum and the crude product was purified by silica-gel column chromatography (DCM: hexane = 1: 2) to afford the product as a yellow solid (2.84 g, 86%). <sup>1</sup>H NMR (500 MHz, Chloroform-d) δ 7.98 -

7.81 (br, 2H), 7.44 (d, J = 8.4 Hz, 2H), 7.09 (d, J = 8.5 Hz, 2H), 6.70 (d, J = 2.0 Hz, 2H), 6.17 (d, J = 2.8 Hz, 2H), 5.90 (s, 1H), 5.43 (s, 1H). <sup>13</sup>C NMR (126 MHz, Chloroform-d) δ 141.22, 131.73, 130.17, 120.88, 117.55, 108.61, 107.48, 43.45. HRMS (ESI) calcd for C<sub>15</sub>H<sub>13</sub>BrN<sub>2</sub><sup>+</sup> (M+H)<sup>+</sup>: 301.0166, found: 299.0178.

### Synthesis of 10-phenyl-5,15-(4-bromophenyl)-corrole

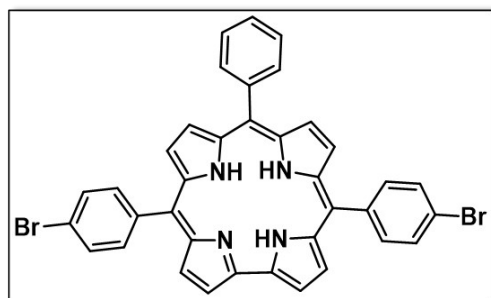

Benzaldehyde (200 mg, 1.88 mmol) and 5-(4-bromophenyl)-dipyrromethane (1.13 g, 3.75 mmol) were dissolved in a mixture of MeOH (100 mL), H<sub>2</sub>O (100 mL), and HCl (6 mL, 36 %).

The mixture was stirred for 2 h at room temperature. Then it was extracted with DCM, the organic phase was washed three times with water, dried over Na<sub>2</sub>SO<sub>4</sub>. After that, chloranil (1.39 g, 5.64 mmol) was added, and the resulted solution was stirred for another 2 h under dark. The solution was evaporated and then filtered through a pad of silica with DCM until the eluting solution was pale brown. The organic phase was concentrated, and then the crude product was purified by silica-gel chromatography (DCM: hexane = 1: 2) to afford the product as a purple solid (192 mg, 15%). <sup>1</sup>H NMR (400 MHz, Chloroform-d) δ 8.85 (d, J = 20.2 Hz, 4H), 8.47 (d, J = 70.4 Hz, 8H), 7.84 (d, J = 26.2 Hz, 7H), 7.47 (s, 2H). HRMS (ESI) calcd for C<sub>37</sub>H<sub>24</sub>Br<sub>2</sub>N<sub>4</sub><sup>+</sup> (M+H)<sup>+</sup>: 685.0423, found: 683.0440.

### Synthesis of Co complex of 10-phenyl-5,15-(4-bromophenyl)-corrole

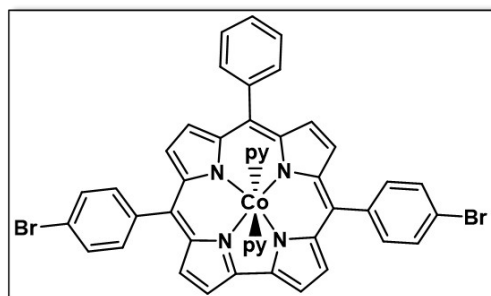

10-phenyl-5,15-(4-bromophenyl)-corrole (136 mg, 0.2 mmol) and Co(OAc)<sub>2</sub> · 4H<sub>2</sub>O (250 mg, 1.0 mmol) were dissolved in 10 mL pyridine. The solution was refluxed for 15 min, and the solvent was then evaporated

using a rotavap. The crude product was purified by silica-gel chromatography (DCM: pyridine = 1: 0.01) to afford a purple solid. Subsequent recrystallization from

DCM/heptane afforded purple plates of Co corrole (122 mg, yield 80%).  $^1\text{H}$  NMR (500 MHz, Chloroform- $d$ )  $\delta$  8.86 (m, 4H), 8.22 - 7.45 (m, 13H), 6.28 (s, 4H), 5.66 (s, 4H), 3.14 (s, 2H), 1.08 (m, 4H). HRMS (ESI) calcd for  $\text{C}_{37}\text{H}_{21}\text{Br}_2\text{CoN}_4^+$  ( $\text{M}-2\text{py}$ ) $^+$ : 739.9439, found: 739.9459.

### Synthesis of Fe complex of 10-phenyl-5,15-(4-bromophenyl)-corrole

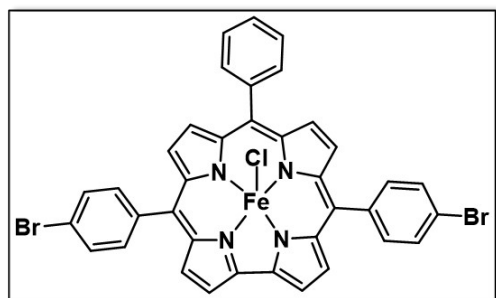

10-phenyl-5,15-(4-bromophenyl)-corrole (136 mg, 0.2 mmol) and  $\text{FeCl}_2$  (127 mg, 1.0 mmol) were dissolved in 15 mL DMF. The solution was refluxed for 4 h under  $\text{N}_2$ , and the solvent was then evaporated using a rotavap.

The crude product was purified by silica gel chromatography (DCM) to afford a purple solid. Subsequent recrystallization from DCM/heptane afforded purple plates of Fe corrole (109 mg, yield 70%). HRMS (ESI) calcd for  $\text{C}_{38}\text{H}_{24}\text{Br}_2\text{FeN}_4^+$  ( $\text{M}-\text{Cl}$ ) $^+$ : 736.9468, found: 734.9477.

### Synthesis of Cu complex of 10-phenyl-5,15-(4-bromophenyl)-corrole

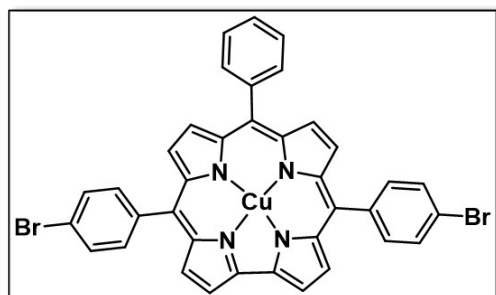

10-phenyl-5,15-(4-bromophenyl)-corrole (136 mg, 0.2 mmol) and  $\text{Cu}(\text{OAc})_2 \cdot \text{H}_2\text{O}$  (200 mg, 1.0 mmol) were dissolved in a mixture of  $\text{C}_2\text{H}_5\text{OH}$  (50 mL) and DCM (10 mL). The mixture was stirred for 15 min at

room temperature in the dark. Then it was extracted with DCM, the organic phase was washed three times with water, dried over  $\text{Na}_2\text{SO}_4$ . The organic phase was concentrated, and then the crude product was purified by silica-gel chromatography (DCM: hexane = 1: 2) to afford the product as a brown color solid (126 mg, 85%). HRMS (ESI) calcd for  $\text{C}_{37}\text{H}_{21}\text{Br}_2\text{CuN}_4^+$  ( $\text{M}+\text{H}$ ) $^+$ : 743.9409, found: 741.9423.

## Synthesis of tri[4-(4,4,5,5-tetramethyl-1,3,2-dioxaborolan-2-yl)phenyl]amine

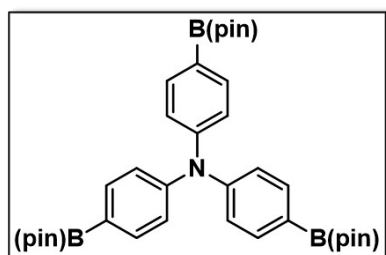

Tris(4-bromophenyl)amine (2 g, 4.15 mmol), bis(pinacolato)diboron (3.69 g, 14.5 mmol),  $\text{CH}_3\text{CO}_2\text{K}$  (1.22 g, 12.4 mmol), and  $\text{Pd}(\text{dppf})\text{Cl}_2$  (152 mg, 0.20 mmol) were dissolved in 50 ml 1,4-dioxane under inert atmosphere and then heated to 100 °C for 12 h. The resulting suspension was extracted with DCM and dried over  $\text{MgSO}_4$ . After the organic solvent was removed under vacuum, the crude product was purified by silica-gel chromatography (DCM: hexane = 1: 2) to afford the product as a white solid (2.59 g, 73%).  $^1\text{H}$  NMR (500 MHz, Chloroform- $d$ )  $\delta$  7.68 (d,  $J$  = 8.5 Hz, 6H), 7.08 (d,  $J$  = 8.5 Hz, 6H), 1.34 (s, 36H). HRMS (ESI) calcd for  $\text{C}_{36}\text{H}_{48}\text{B}_3\text{NO}_6$  ( $\text{M}+\text{Na}$ ) $^+$ : 646.3673, found: 646.3653.

### 3. Analytical Data

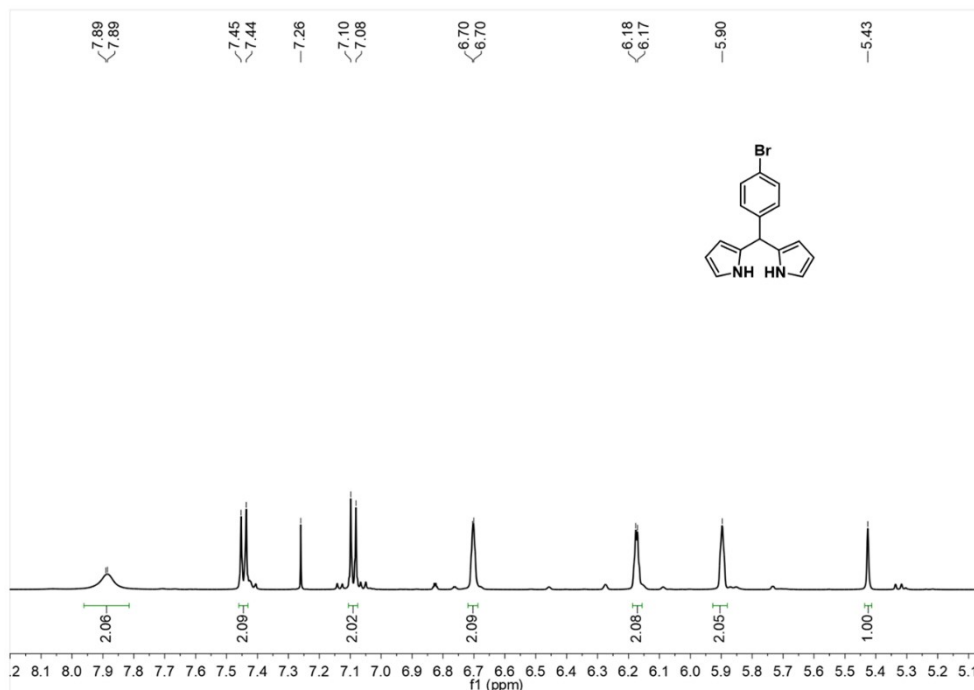

**Fig. S1**  $^1\text{H}$  NMR spectrum of 5-(4-bromophenyl)dipyrromethane in  $\text{CDCl}_3$ .

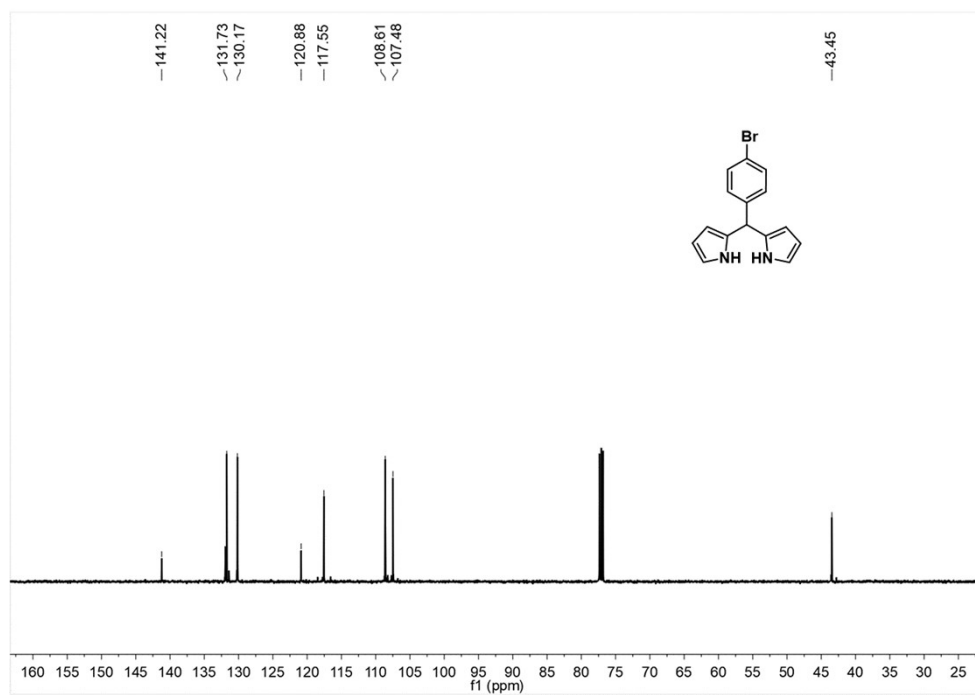

**Fig. S2**  $^{13}\text{C}$  NMR spectrum of 5-(4-bromophenyl)dipyrromethane in  $\text{CDCl}_3$ .

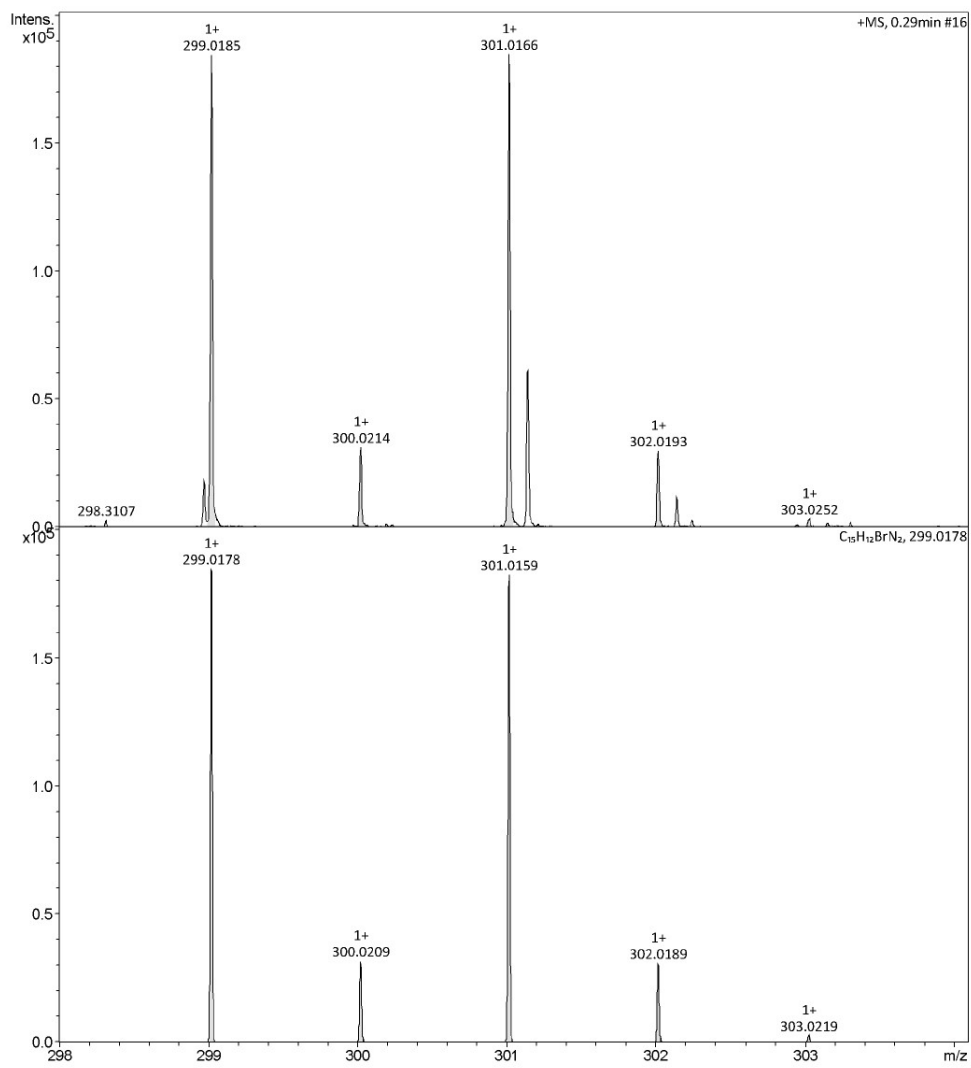

**Fig. S3** HRMS spectrum of 5-(4-bromophenyl)dipyrromethane

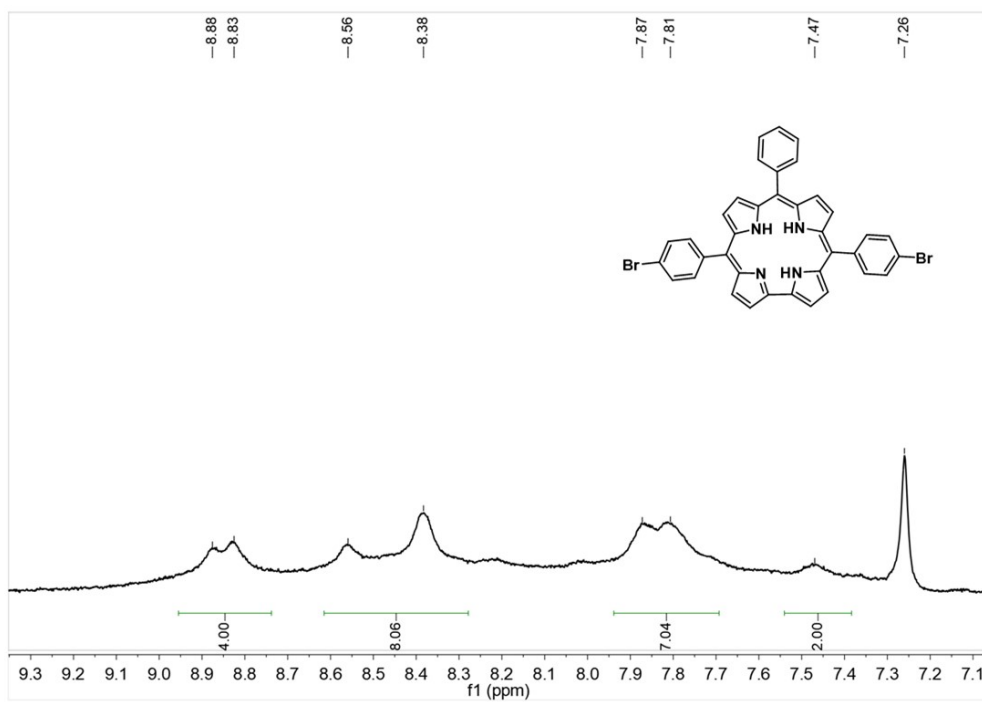

**Fig. S4** <sup>1</sup>H NMR spectrum of 10-phenyl-5,15-(4-bromophenyl)-corrole in CDCl<sub>3</sub>.



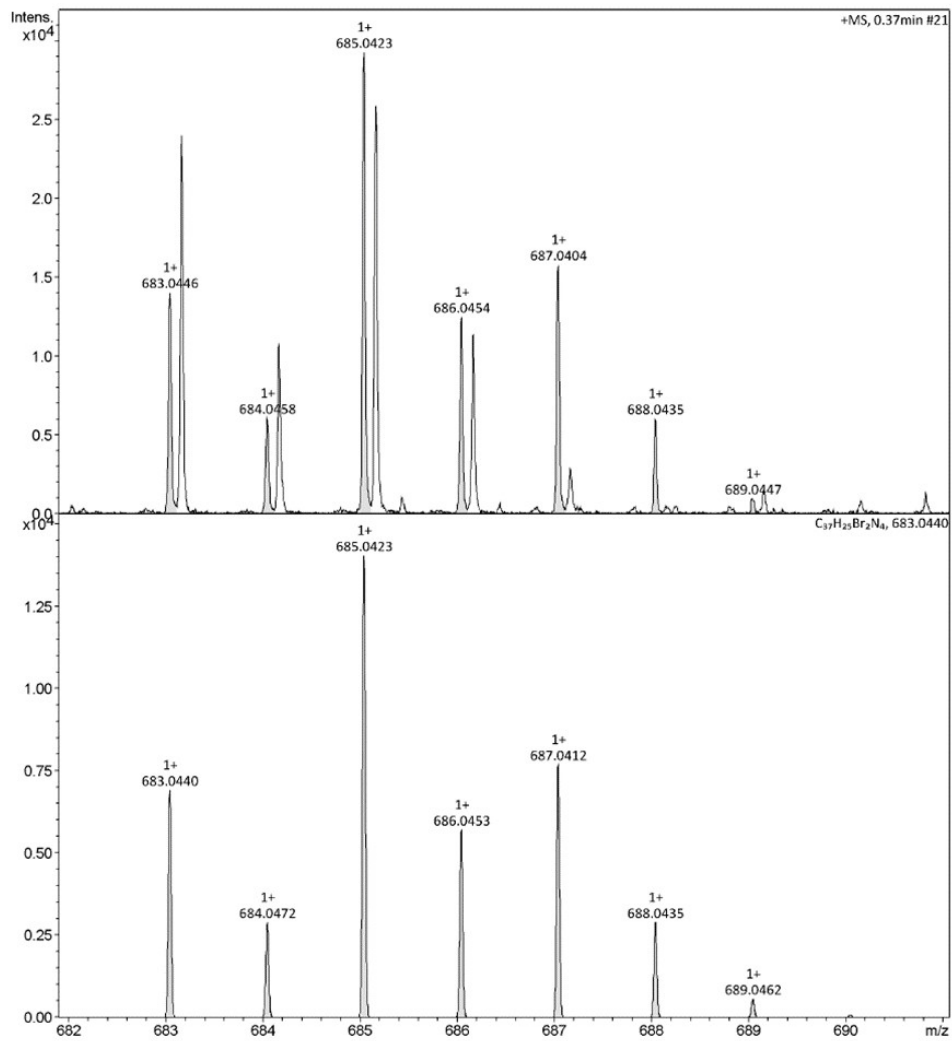

**Fig. S5** HRMS spectrum of 10-phenyl-5,15-(4-bromophenyl)-corrole

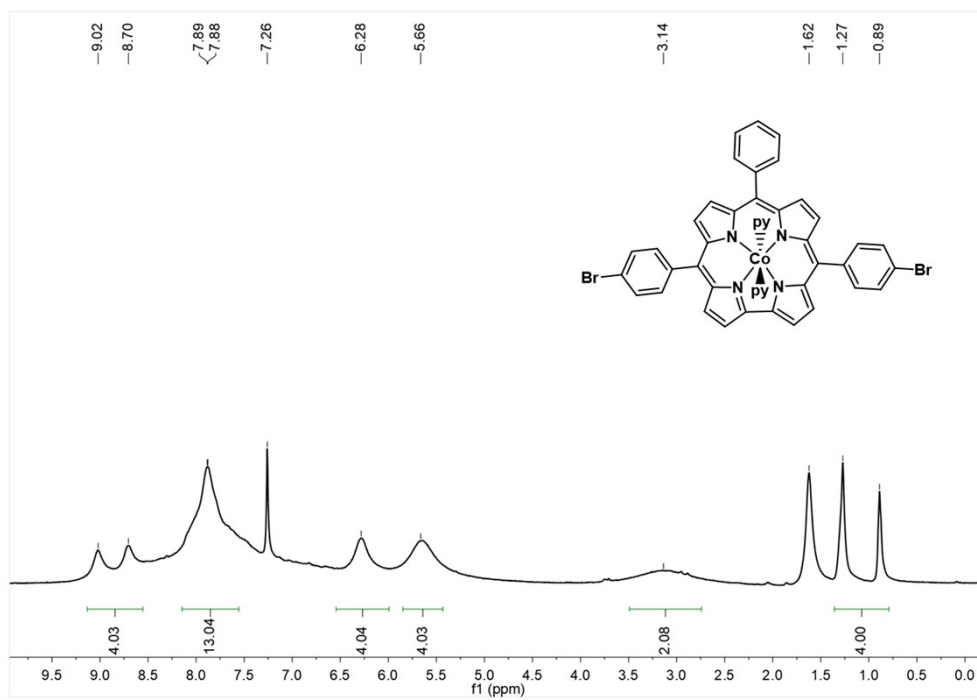

**Fig. S6**  $^1\text{H}$  NMR spectrum of Co complex of 10-phenyl-5,15-(4-bromophenyl)-corrole in  $\text{CDCl}_3$ .

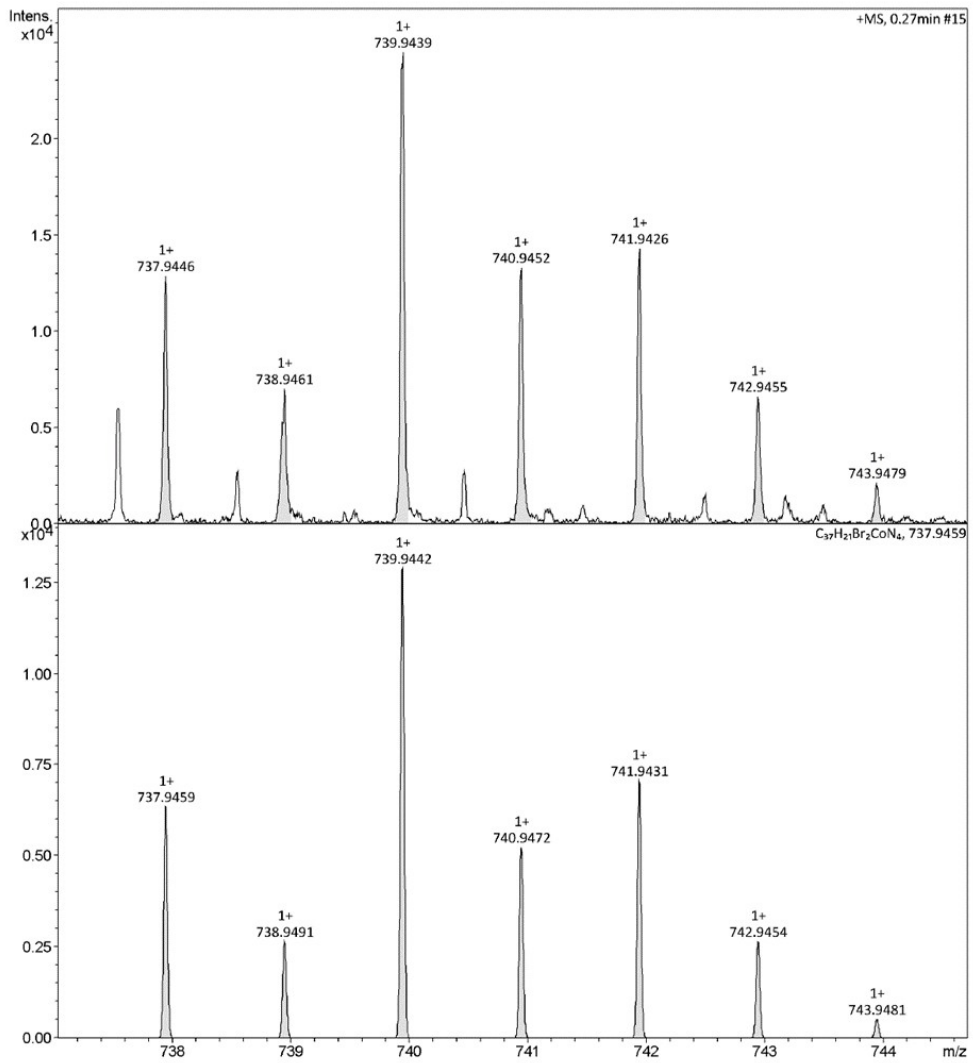

**Fig. S7** HRMS spectrum of Co complex 10-phenyl-5,15-(4-bromophenyl)-corrole

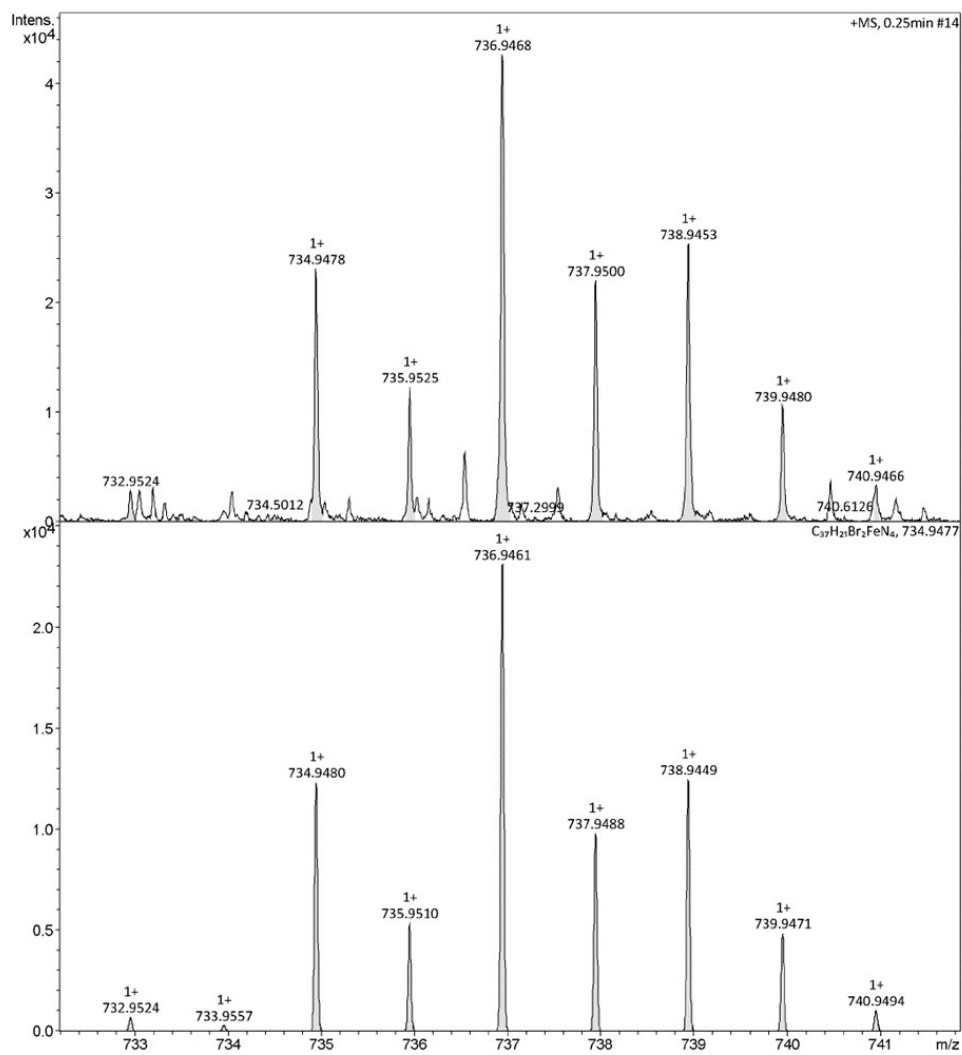

**Fig. S8** HRMS spectrum of Fe complex 10-phenyl-5,15-(4-bromophenyl)-corrole

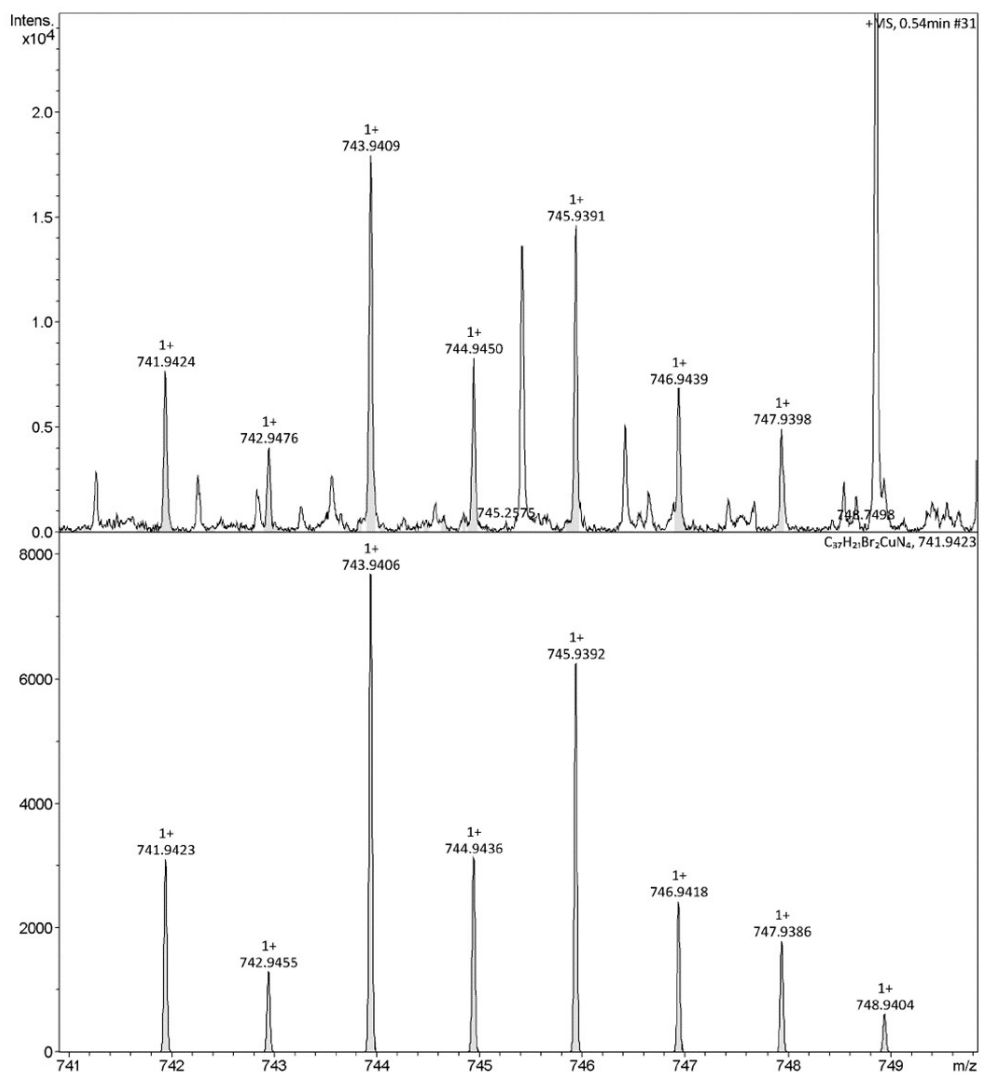

**Fig. S9** HRMS spectrum of Cu complex 10-phenyl-5,15-(4-bromophenyl)-corrole

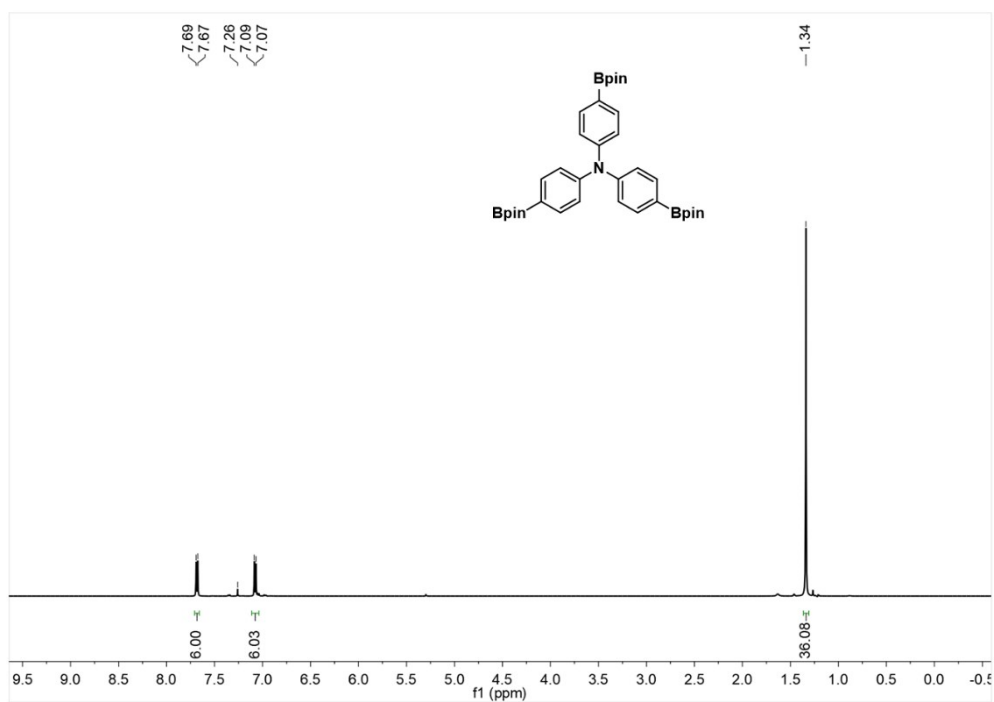

**Fig. S10**  $^1\text{H}$  NMR spectrum of tri[4-(4,4,5,5-tetramethyl-1,3,2-dioxaborolan-2-yl)phenyl]amine in  $\text{CDCl}_3$ .

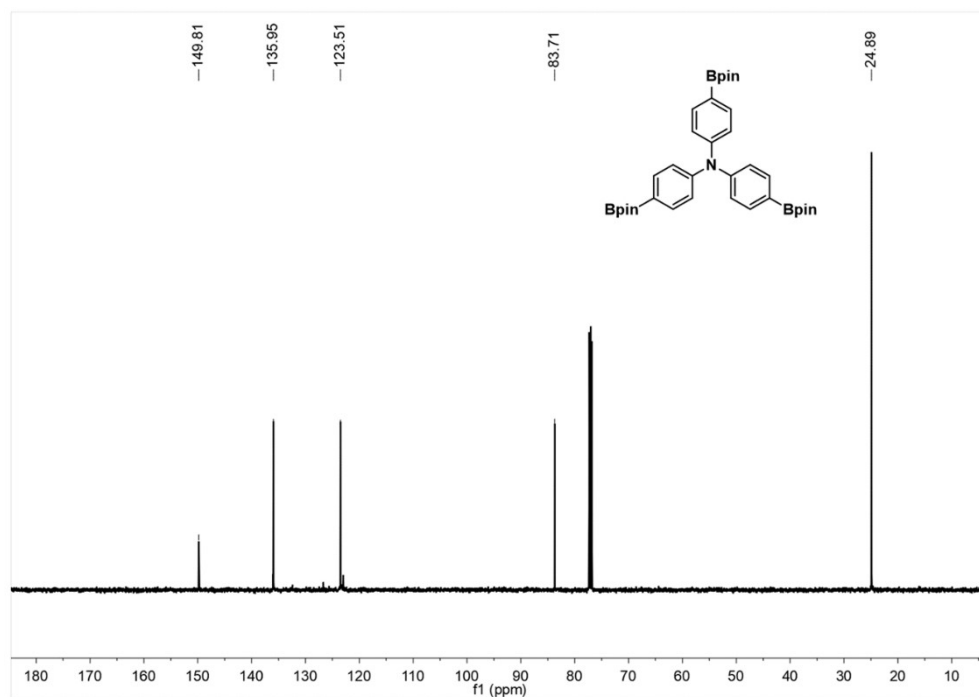

**Fig. S11**  $^{13}\text{C}$  NMR spectrum of tri[4-(4,4,5,5-tetramethyl-1,3,2-dioxaborolan-2-yl)phenyl]amine in  $\text{CDCl}_3$ .

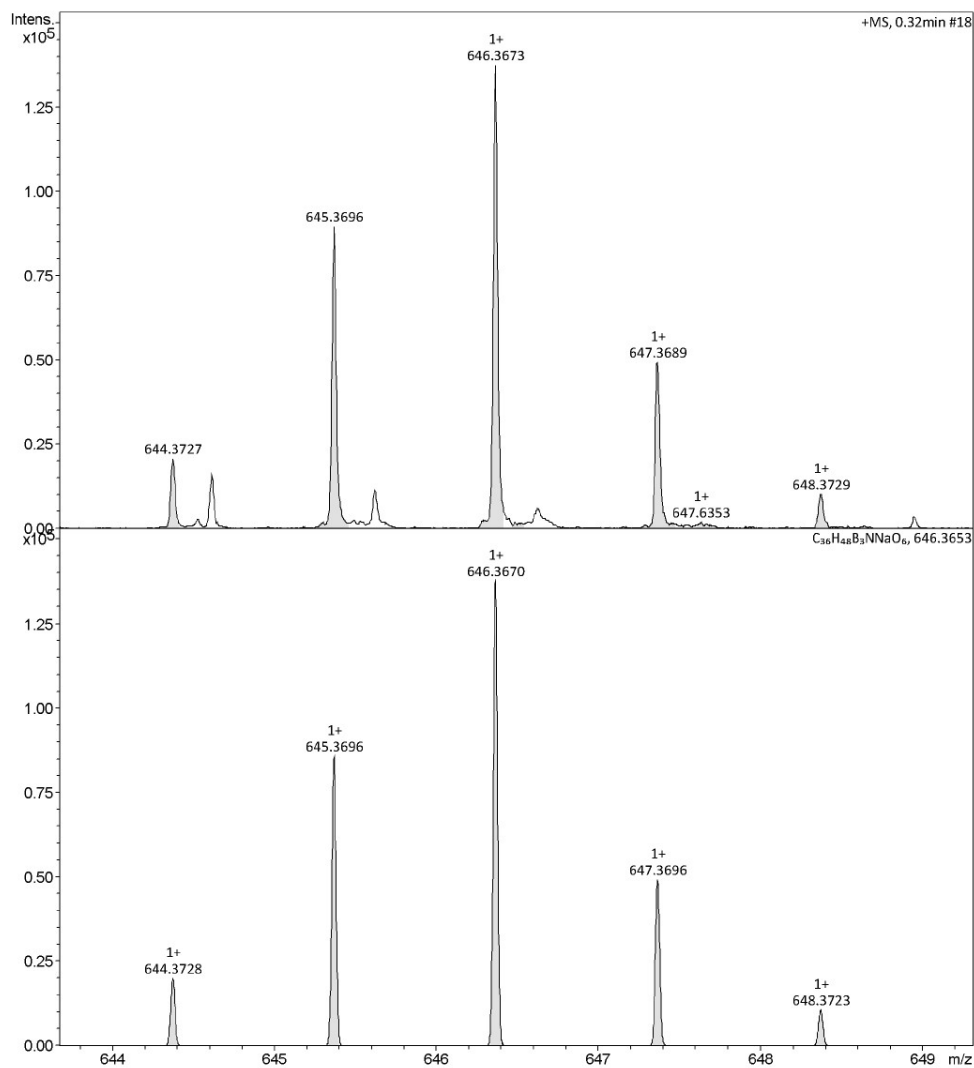

**Fig. S12** HRMS spectrum of tri[4-(4,4,5,5-tetramethyl-1,3,2-dioxaborolan-2-yl)phenyl]amine

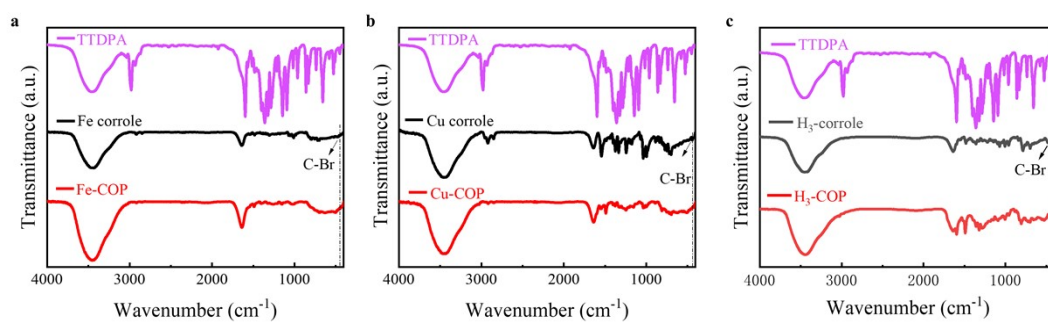

**Fig. S13** Infrared spectra of (a) Fe-COP, (b) Cu-COP, and (c) H<sub>3</sub>-COP.

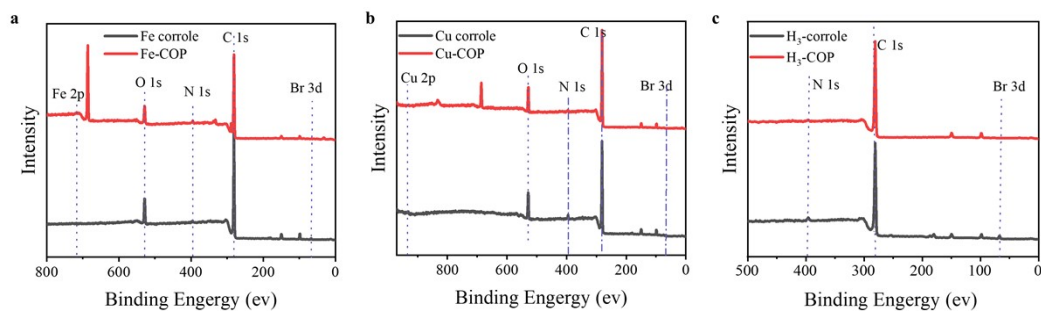

**Fig. S14** XPS survey scan spectra of (a) Fe-COP and Fe corrole, (b) Cu-COP and Cu corrole, (c) H<sub>3</sub>-COP. and H<sub>3</sub> corrole

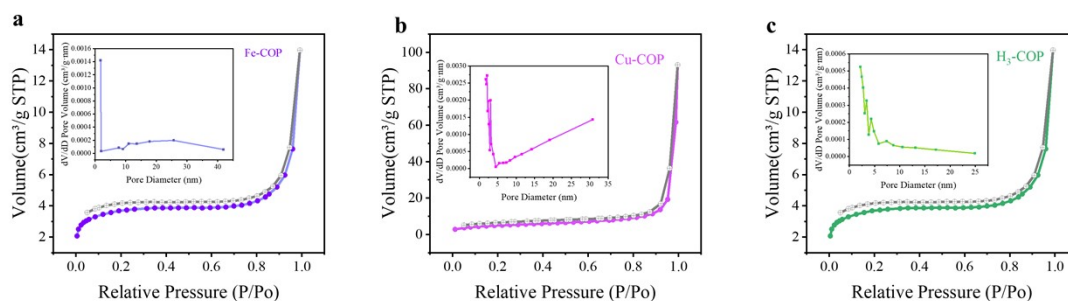

**Fig. S15** XPS survey scan spectra of (a) Fe-COP and Fe corrole, (b) Cu-COP and Cu corrole, (c) H<sub>3</sub>-COP. and H<sub>3</sub> corrole

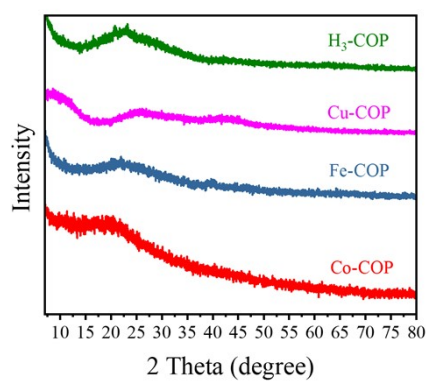

**Fig. S16** XRD patterns of Co-COP, Fe-COP, Cu-COP, H<sub>3</sub>-COP, respectively.



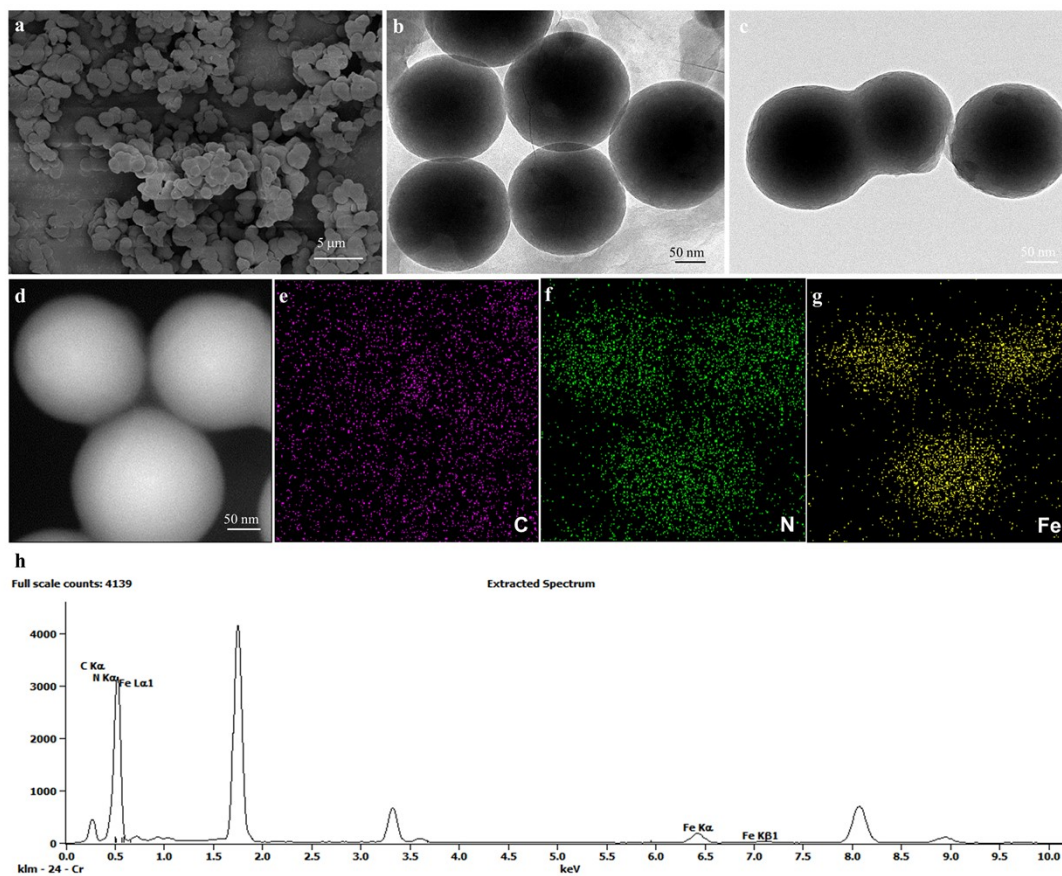

**Fig. S17** Morphological and compositional characterizations of Fe-COP. a) SEM image. b, c) TEM images. d) HAADF-STEM image and e-g) Corresponding elemental mapping images of Fe-COP. h) EDX spectrum.

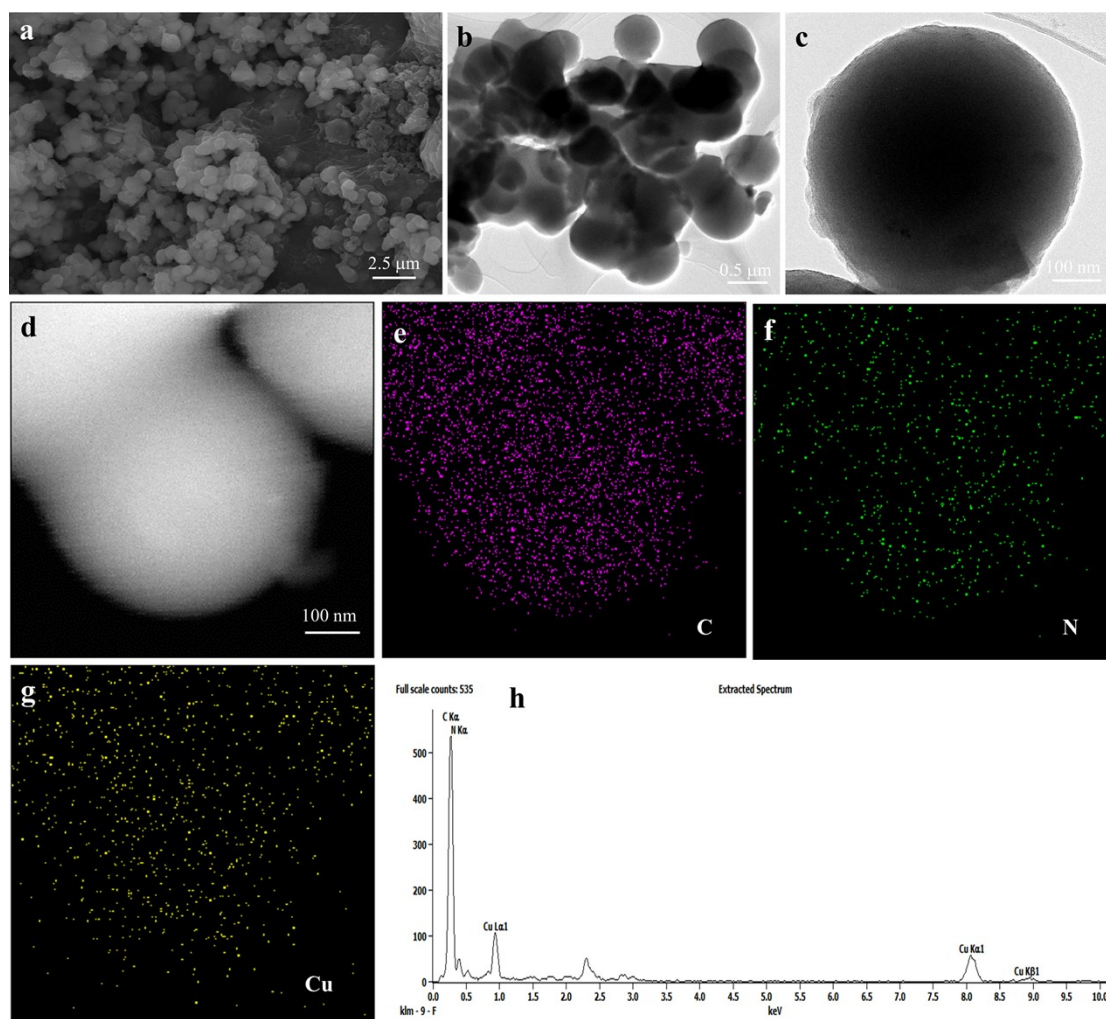

**Fig. S18** Morphological and compositional characterizations of Cu-COP. a) SEM image. b, c) TEM images. d) HAADF-STEM image and e-g) Corresponding elemental mapping images of Cu-COP. h) EDX spectrum.

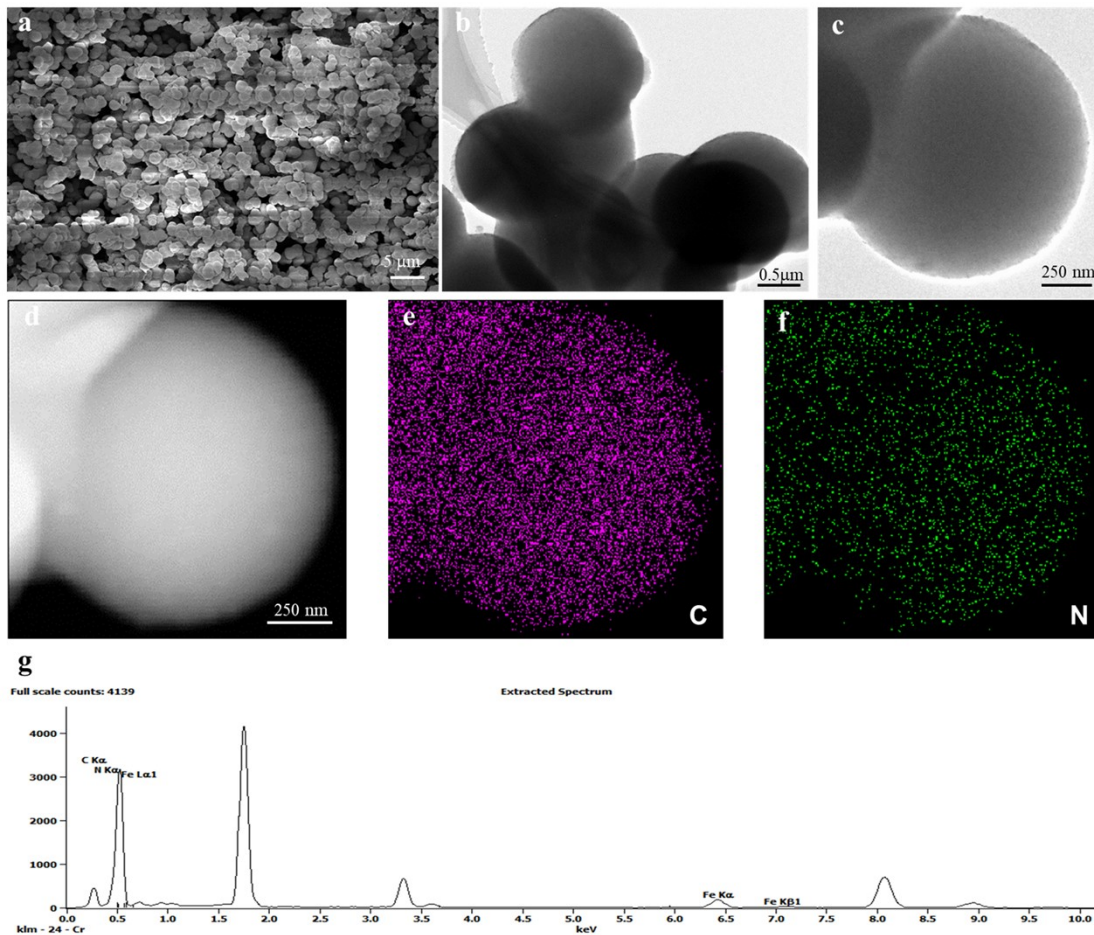

**Fig. S19** Morphological and compositional characterizations of H<sub>3</sub>-COP. a) SEM image. b, c) TEM images. d) HAADF-STEM image and e, f) Corresponding elemental mapping images of H<sub>3</sub>-COP. g) EDX spectrum.

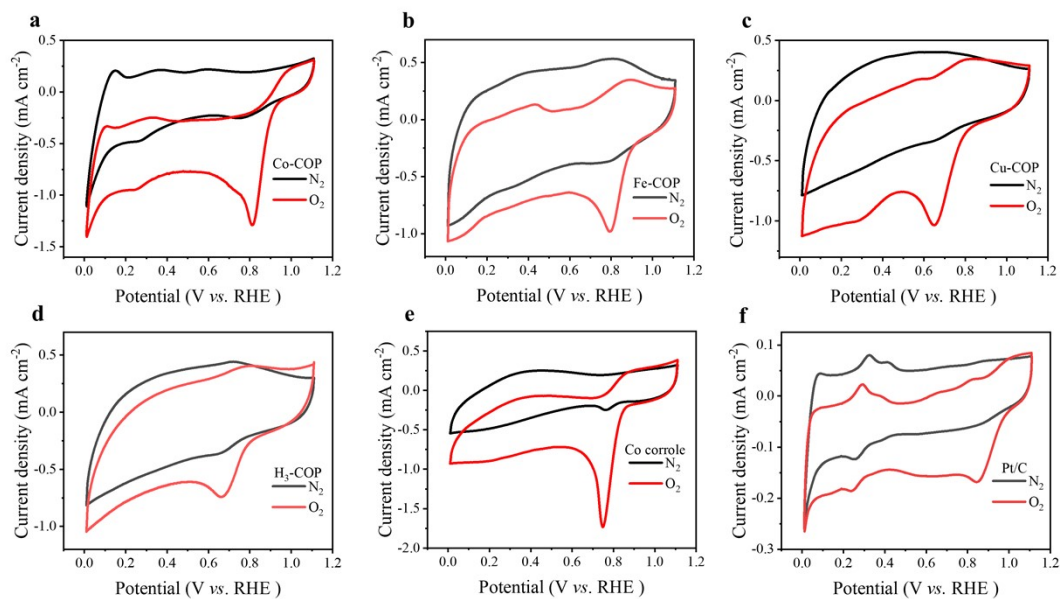

**Fig. S20** CV curves in  $N_2/O_2$ -saturated 0.1 M KOH solution at  $50 \text{ mV s}^{-1}$ ; a) CV curves of Co-COP. b) CV curves of Fe-COP. c) CV curves of Cu-COP. d) CV curves of  $H_3$ -COP. e) CV curves of Co corrole. f) CV curves of Pt/C.

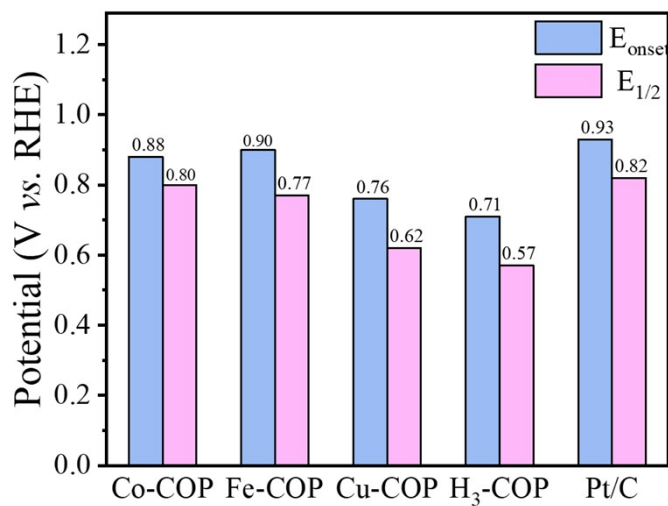

**Fig. S21** Initial potential and half-wave potential of Co-COP, Fe-COP, Cu-COP,  $H_3$ -COP and Pt/C.

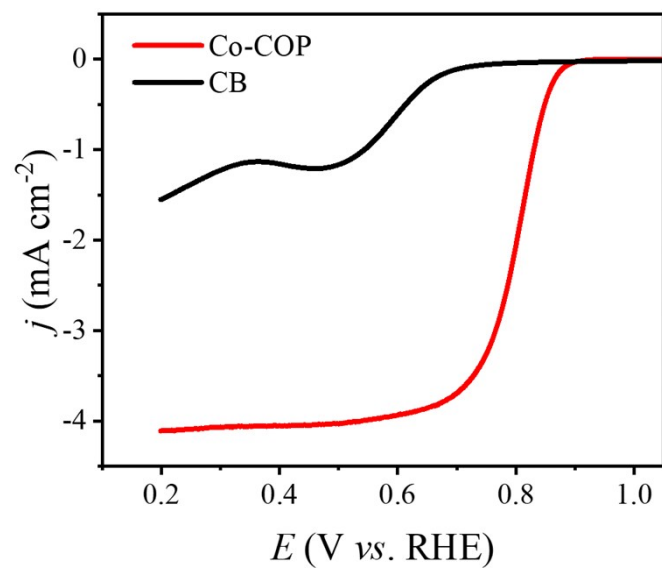

**Fig. S22** a) ORR LSVs of Co-COP and unmodified CB at a scan rate of  $5 \text{ mV s}^{-1}$  and 1600 rpm in  $\text{O}_2$ -saturated 0.1 M KOH solution.

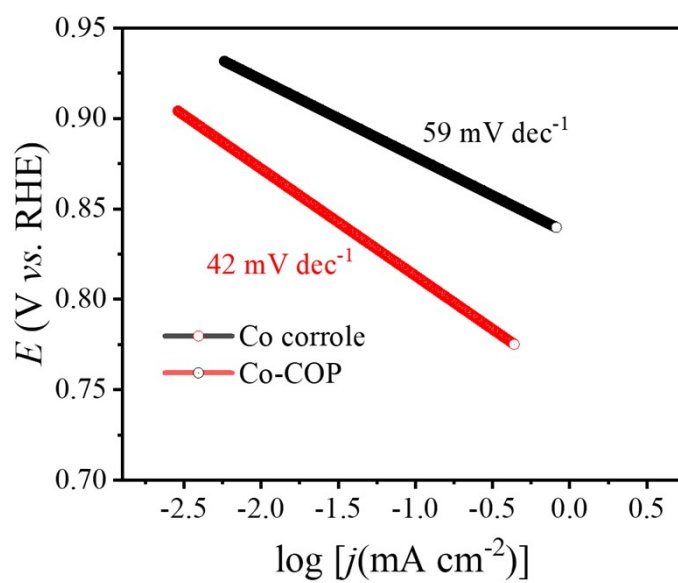

**Fig. S23** ORR Tafel slopes derived from the corresponding polarization curves of Co-COP and Co corrole.

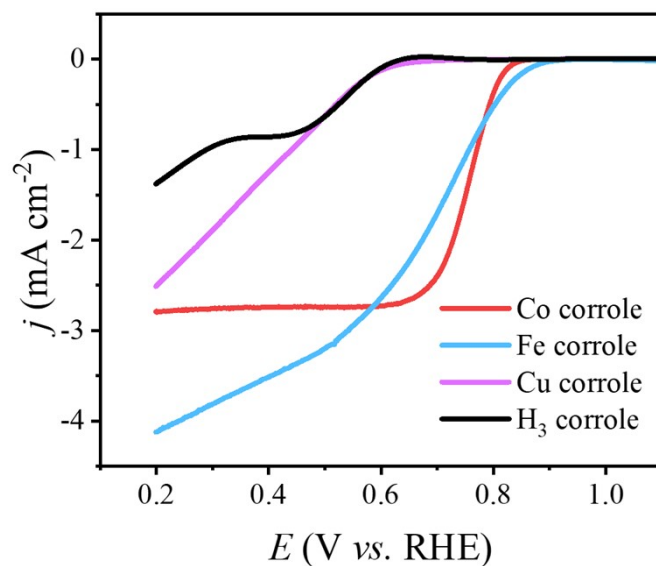

**Fig. S24** ORR LSVs of Co corrole, Fe corrole, Cu corrole, and H<sub>3</sub> corrole at 1600 rpm rotation rate in 0.1 M KOH solutions.

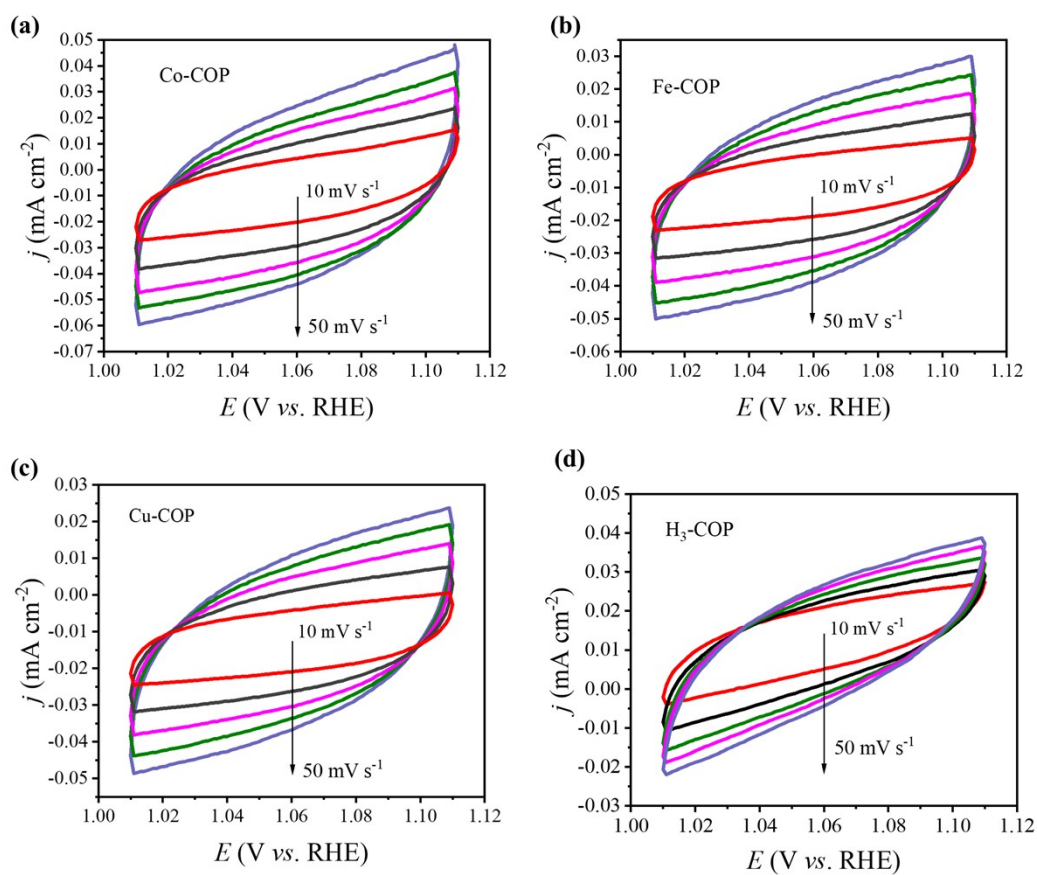

**Fig. S25** ORR CV measurements at different scan rates for (a) Co-COP, (b) Fe-COP, (c) Cu-COP, and (d) H<sub>3</sub>-COP.

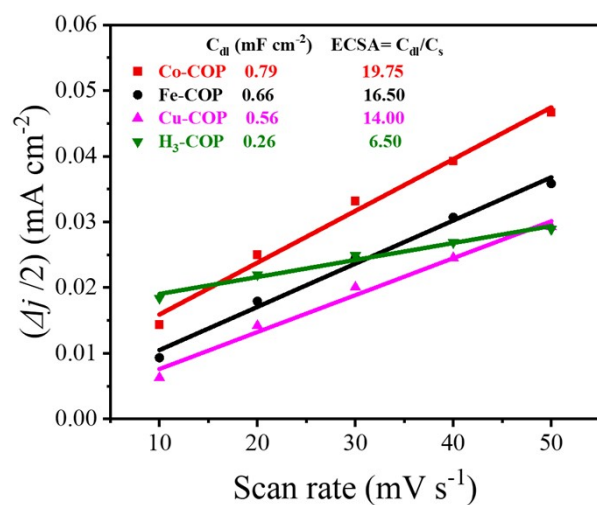

**Fig. S26** ECSA values estimated from double-layer capacitance ( $C_{dl}$ ) data.

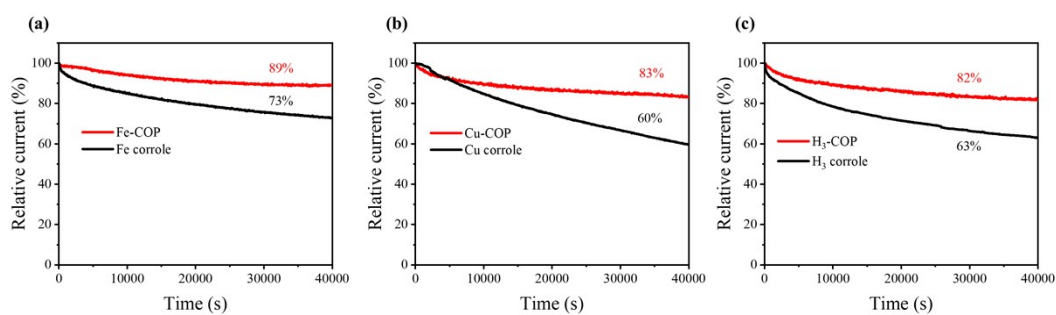

**Fig. S27** The stability assessment of (a) Fe-COP, Fe corrole, (b) Cu-COP, Cu corrole and (c) H<sub>3</sub>-COP, H<sub>3</sub> corrole.

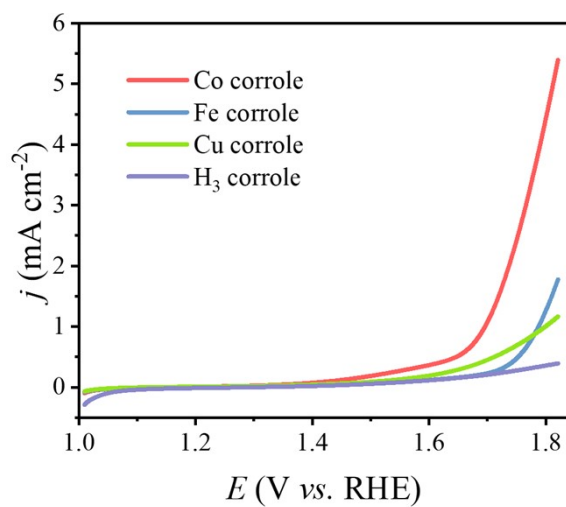

**Fig. S28** OER LSVs of Co corrole, Fe corrole, Cu corrole, and H<sub>3</sub> corrole at 1600 rpm rotation rate in 0.1 M KOH solutions.

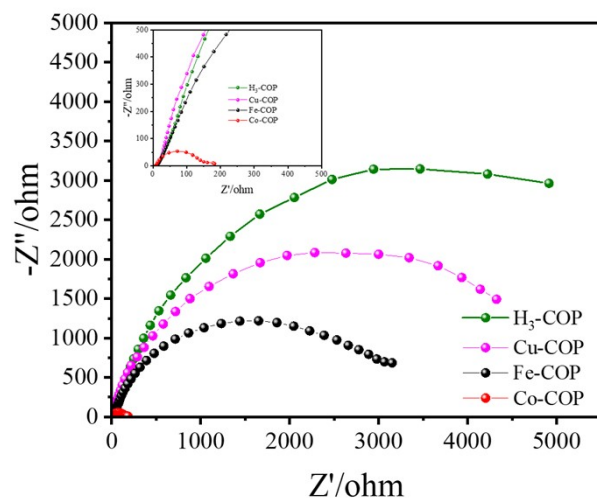

**Fig. S29** HER EIS spectra for Co-COP, Fe-COP, Cu-COP, and H<sub>3</sub>-COP.

**Table. S1** Literature comparison of ORR performances with other COPs based catalysts.

| Catalyst                     | Electrolyte | Half-wave                | Onset                    | Reference |
|------------------------------|-------------|--------------------------|--------------------------|-----------|
|                              |             | potential<br>(V vs. RHE) | potential<br>(V vs. RHE) |           |
| Co-COP                       | 0.1M KOH    | 0.80                     | 0.88                     | This work |
| TPA-tpd-Co                   | 0.1M KOH    | -                        | 0.80                     | [1]       |
| CoTAPP-NA                    | 0.1M KOH    | 0.84                     | 0.95                     | [2]       |
| PPy/FeTCPP/Co                | 0.1M KOH    | 0.86                     | 1.01                     | [3]       |
| COP-PSO <sub>3</sub> -Co-rGO | 0.1M KOH    | 0.72                     | 0.88                     | [4]       |
| NDI-COF/GC                   | 0.1 M NaOH  | 0.63                     | 0.75                     | [5]       |
| CoCOF-PyrGO                  | 0.1 M KOH   | 0.74                     | 0.82                     | [6]       |
| Co-POP                       | 0.1 M KOH   | 0.87                     | -                        | [7]       |
| Co@TBPA-phen                 | 1.0 M KOH   | -                        | 0.82                     | [8]       |
| FeNi-COP-800                 | 1.0 M KOH   | 0.80                     | -                        | [9]       |
| Co porphyrin@ZIF-67          | 0.1 M KOH   | 0.79                     | -                        | [10]      |
| PCN-226-Co/C                 | 0.1 M KOH   | 0.75                     | 0.83                     | [11]      |



**Table. S2** Literature comparison of OER performances with other COPs based catalysts.

| Catalyst        | Electrolyte | Overpotential<br>(mV, at 10 mA·cm <sup>-2</sup> ) | Tafel<br>Slope<br>(mV dec <sup>-1</sup> ) | Reference |
|-----------------|-------------|---------------------------------------------------|-------------------------------------------|-----------|
| Co-COP          | 0.1M KOH    | 560                                               | 96                                        | This work |
| TPA-tpd-Co      | 0.1M KOH    | 440                                               | 42                                        | [1]       |
| CoTAPP-NA       | 1.0 M KOH   | 416                                               | 68                                        | [2]       |
| Ni-TAPP- NA     | 1.0 M KOH   | 486                                               | 81                                        | [2]       |
| PPy/FeTCPP/Co   | 1.0 M KOH   | 380                                               | 61                                        | [3]       |
| Cu-CMP900       | 1.0 M KOH   | 560                                               | 80                                        | [12]      |
| CoCOP           | 1.0 M KOH   | 350                                               | 151                                       | [13]      |
| Co-POP          | 1.0 M KOH   | 340                                               | 93                                        | [7]       |
| zCo@TBPA-phen   | 1.0 M KOH   | 480                                               | 115                                       | [8]       |
| FeNi-COP-800    | 1.0 M KOH   | 400                                               | 103                                       | [9]       |
| PCN-226-Co/C    | 1.0 M KOH   | 440                                               | 111                                       | [11]      |
| Pb-TCPP         | 1.0 M KOH   | 470                                               | 106                                       | [14]      |
| CoP-2ph-CMP-800 | 1.0 M KOH   | 370                                               | 86                                        | [15]      |

**Table. S3** Literature comparison of HER performances with other COPs based catalysts.

| Catalyst                | Electrolyte                          | Overpotential<br>(mV, at 10 mA·cm <sup>-2</sup> ) | Tafel<br>Slope<br>(mV dec <sup>-1</sup> ) | Reference |
|-------------------------|--------------------------------------|---------------------------------------------------|-------------------------------------------|-----------|
| Co-COP                  | 0.1M KOH                             | 208                                               | 83                                        | This work |
| TPA-tpd-Co              | 0.1M KOH                             | 428                                               | -                                         | [1]       |
| CoTAPP-NA               | 1.0 M KOH                            | 470                                               | 110                                       | [2]       |
| PPy/FeTCPP/Co           | 1.0 M KOH                            | 240                                               | 83                                        | [3]       |
| Cu-CMP900               | 1.0 M KOH                            | 430                                               | 135                                       | [12]      |
| CoCOP                   | 1.0 M KOH                            | 310                                               | 161                                       | [13]      |
| Co@TBPA-phen            | 0.5 M H <sub>2</sub> SO <sub>4</sub> | 335                                               | 115                                       | [8]       |
| CoP-2ph-CMP-800         | 1.0 M KOH                            | 360                                               | 121                                       | [15]      |
| CoTCPP polymer          | 0.5 M H <sub>2</sub> SO <sub>4</sub> | 475                                               | 197                                       | [16]      |
| COF-Ni(OH) <sub>2</sub> | 1.0 M KOH                            | 258                                               | 38.9                                      | [17]      |
| TiCP-PCP                | 0.5 M H <sub>2</sub> SO <sub>4</sub> | 339                                               | 142                                       | [18]      |

**References:**

- [1] S. Singh, M.K. Ghorai, K.K. Kar, Cobalt(ii)-bridged triphenylamine and terpyridine-based donor-acceptor coordination polymer as an efficient trifunctional electrocatalyst, *J Mater Chem a* 11 (2023) 8003-8012.
- [2] G. Cai, L. Zeng, L. He, S. Sun, Y. Tong, J. Zhang, Imine Gels Based on Ferrocene and Porphyrin and Their Electrocatalytic Property, *Chemistry-An Asian Journal* 15 (2020) 1963-1969.
- [3] J. Yang, X. Wang, B. Li, L. Ma, L. Shi, Y. Xiong, H. Xu, Novel Iron/Cobalt-Containing Polypyrrole Hydrogel-Derived Trifunctional Electrocatalyst for Self-Powered Overall Water Splitting, *Adv Funct Mater* 27 (2017) 1606497.
- [4] J. Guo, C. Lin, Z. Xia, Z. Xiang, A Pyrolysis-Free Covalent Organic Polymer for Oxygen Reduction, *Angewandte Chemie International Edition* 57 (2018) 12567-12572.
- [5] S. Royuela, E. Martínez-Periñán, M.P. Arrieta, J.I. Martínez, M.M. Ramos, F. Zamora, E. Lorenzo, J.L. Segura, Oxygen reduction using a metal-free naphthalene diimide-based covalent organic framework electrocatalyst, *Chem Commun* 56 (2020) 1267-1270.
- [6] Q. Zuo, G. Cheng, W. Luo, A reduced graphene oxide/covalent cobalt porphyrin framework for efficient oxygen reduction reaction, *Dalton T* 46 (2017) 9344-9348.
- [7] H. Lei, Q. Zhang, Z. Liang, H. Guo, Y. Wang, H. Lv, X. Li, W. Zhang, U. Apfel, R. Cao, Metal-Corrole-Based Porous Organic Polymers for Electrocatalytic Oxygen Reduction and

Evolution Reactions, *Angewandte Chemie International Edition* 61 (2022) e202201104.

- [8] S. Singh, M.K. Ghorai, K.K. Kar, A cobalt harnessed phenanthroline and triphenylamine-based conjugated mesoporous polymer designed by a donor-acceptor approach for trifunctional electrocatalysis, *J Mater Chem a* (2023).
- [9] Z. Liao, Y. Wang, Q. Wang, Y. Cheng, Z. Xiang, Bimetal-phthalocyanine based covalent organic polymers for highly efficient oxygen electrode, *Applied Catalysis B: Environmental* 243 (2019) 204-211.
- [10] Z. Liang, H. Guo, G. Zhou, K. Guo, B. Wang, H. Lei, W. Zhang, H. Zheng, U. Apfel, R. Cao, Metal-Organic-Framework-Supported Molecular Electrocatalysis for the Oxygen Reduction Reaction, *Angewandte Chemie International Edition* 60 (2021) 8472-8476.
- [11] M.O. Cichocka, Z. Liang, D. Feng, S. Back, S. Siahrostami, X. Wang, L. Samperisi, Y. Sun, H. Xu, N. Hedin, H. Zheng, X. Zou, H. Zhou, Z. Huang, A Porphyrinic Zirconium Metal–Organic Framework for Oxygen Reduction Reaction: Tailoring the Spacing between Active-Sites through Chain-Based Inorganic Building Units, *J Am Chem Soc* 142 (2020) 15386-15395.
- [12] S. Cui, M. Qian, X. Liu, Z. Sun, P. Du, A Copper Porphyrin-Based Conjugated Mesoporous Polymer-Derived Bifunctional Electrocatalyst for Hydrogen and Oxygen Evolution, *Chemsuschem* 9 (2016) 2365-2373.
- [13] A. Wang, L. Cheng, W. Zhao, X. Shen, W. Zhu, Electrochemical hydrogen and oxygen evolution reactions from a cobalt-porphyrin-based covalent organic polymer, *J Colloid Interf Sci* 579 (2020) 598-606.
- [14] F. Dai, W. Fan, J. Bi, P. Jiang, D. Liu, X. Zhang, H. Lin, C. Gong, R. Wang, L. Zhang, D. Sun, A lead-porphyrin metal-organic framework: gas adsorption properties and electrocatalytic activity for water oxidation, *Dalton T* 45 (2016) 61-65.
- [15] H. Jia, Y. Yao, Y. Gao, D. Lu, P. Du, Pyrolyzed cobalt porphyrin-based conjugated mesoporous polymers as bifunctional catalysts for hydrogen production and oxygen evolution in water, *Chem Commun* 52 (2016) 13483-13486.
- [16] Y. Wu, J.M. Veleta, D. Tang, A.D. Price, C.E. Botez, D. Villagrán, Efficient electrocatalytic hydrogen gas evolution by a cobalt-porphyrin-based crystalline polymer, *Dalton T* 47 (2018) 8801-8806.
- [17] D. Mullangi, V. Dhavale, S. Shalini, S. Nandi, S. Collins, T. Woo, S. Kurungot, R. Vaidhyanathan, Low-Overpotential Electrocatalytic Water Splitting with Noble-Metal-Free Nanoparticles Supported in a sp<sup>3</sup> N-Rich Flexible COF, *Adv Energy Mater* 6 (2016) 1600110.
- [18] A. Wang, L. Cheng, X. Shen, W. Zhu, L. Li, Mechanistic insight on porphyrin based porous titanium coordination polymer as efficient bifunctional electrocatalyst for hydrogen and oxygen evolution reactions, *Dyes Pigments* 181 (2020) 108568.
